# Supplementary material for: Origin of secondary fatty alcohols in atmospheric aerosols in a cool-temperate forest based on their mass size distributions
Source: Copernicus journal article supplement (doi:10.5194/bg-2023-73), 2023-05-23
Supplement: Supplementary file 1 [file bg-2023-73-supplement.pdf]

*Supplement of*

**Origin of secondary fatty alcohols in atmospheric aerosols in a cool-temperate forest based on their mass size distributions**

**Yuhao Cui et al.**

*Correspondence to:* Yuzo Miyazaki (yuzom@lowtem.hokudai.ac.jp)

**Table S1: Concentrations of secondary fatty alcohols (SFAs) in each stage of aerosol sample. ND indicates that the compound was not detected (i.e. below the lower detection limit).**

(a) *n*-nonacosan-10-ol (SFA3)

| Season | Sampling Period      | Concentration (ng m <sup>-3</sup> )     |                                                |                                               |                                              |                                              |                                              |                                              |                                               |                                          |
|--------|----------------------|-----------------------------------------|------------------------------------------------|-----------------------------------------------|----------------------------------------------|----------------------------------------------|----------------------------------------------|----------------------------------------------|-----------------------------------------------|------------------------------------------|
|        |                      | Backup<br>(D <sub>p</sub> < 0.39<br>μm) | Stage 8<br>(D <sub>p</sub> = 0.39–<br>0.58 μm) | Stage 7<br>(D <sub>p</sub> = 0.58–<br>1.0 μm) | Stage 6<br>(D <sub>p</sub> = 1.0–<br>1.9 μm) | Stage 5<br>(D <sub>p</sub> = 1.9–<br>3.0 μm) | Stage 4<br>(D <sub>p</sub> = 3.0–<br>4.3 μm) | Stage 3<br>(D <sub>p</sub> = 4.3–<br>6.4 μm) | Stage 2<br>(D <sub>p</sub> = 6.4–<br>10.0 μm) | Stage 1<br>(D <sub>p</sub> > 10.0<br>μm) |
| Spring | April 26–May 7, 2010 | 0.52                                    | 0.20                                           | 0.65                                          | 1.25                                         | 1.11                                         | 0.87                                         | 0.55                                         | 1.09                                          | 3.09                                     |
|        | May 7–14, 2010       | 0.01                                    | 0.00                                           | 0.00                                          | 0.02                                         | 0.07                                         | 0.08                                         | 0.10                                         | 0.06                                          | 0.15                                     |
|        | May 21–28, 2010      | 0.24                                    | 0.04                                           | 0.29                                          | 1.22                                         | 1.92                                         | 2.09                                         | 3.71                                         | 4.59                                          | 6.99                                     |
| Summer | June 22–29, 2009     | 0.21                                    | 0.14                                           | 0.48                                          | 1.46                                         | 2.34                                         | 3.61                                         | 1.82                                         | 1.11                                          | 4.58                                     |
|        | July 8–16, 2010      | 0.04                                    | 0.02                                           | 0.06                                          | 0.07                                         | 0.49                                         | 0.30                                         | 0.22                                         | 0.13                                          | 0.51                                     |
|        | August 6–13, 2010    | 0.84                                    | 0.05                                           | 0.02                                          | 0.63                                         | 0.33                                         | 0.19                                         | 0.11                                         | 0.10                                          | 0.20                                     |
| Autumn | October 6–13, 2009   | 0.18                                    | 0.09                                           | 0.42                                          | 1.04                                         | 1.45                                         | 0.86                                         | 0.60                                         | 0.64                                          | 0.65                                     |
|        | October 13–21, 2009  | 0.35                                    | 0.20                                           | 0.80                                          | 1.71                                         | 1.65                                         | 1.66                                         | 0.81                                         | 0.92                                          | 1.43                                     |
|        | October 21–28, 2009  | 0.09                                    | 0.08                                           | 0.29                                          | 1.11                                         | 1.00                                         | 0.58                                         | 0.50                                         | 0.47                                          | 0.60                                     |

(b) *n*-nonacosan-5,10-diol (SFA5)

| Season | Sampling Period      | Concentration (ng m <sup>-3</sup> )     |                                                |                                               |                                              |                                              |                                              |                                              |                                               |                                          |
|--------|----------------------|-----------------------------------------|------------------------------------------------|-----------------------------------------------|----------------------------------------------|----------------------------------------------|----------------------------------------------|----------------------------------------------|-----------------------------------------------|------------------------------------------|
|        |                      | Backup<br>(D <sub>p</sub> < 0.39<br>µm) | Stage 8<br>(D <sub>p</sub> = 0.39–<br>0.58 µm) | Stage 7<br>(D <sub>p</sub> = 0.58–<br>1.0 µm) | Stage 6<br>(D <sub>p</sub> = 1.0–<br>1.9 µm) | Stage 5<br>(D <sub>p</sub> = 1.9–<br>3.0 µm) | Stage 4<br>(D <sub>p</sub> = 3.0–<br>4.3 µm) | Stage 3<br>(D <sub>p</sub> = 4.3–<br>6.4 µm) | Stage 2<br>(D <sub>p</sub> = 6.4–<br>10.0 µm) | Stage 1<br>(D <sub>p</sub> > 10.0<br>µm) |
| Spring | April 26–May 7, 2010 | 0.01                                    | 0.00                                           | 0.01                                          | 0.04                                         | 0.03                                         | 0.02                                         | 0.01                                         | 0.04                                          | 0.14                                     |
|        | May 7–14, 2010       | ND                                      | ND                                             | ND                                            | ND                                           | ND                                           | ND                                           | ND                                           | 0.00                                          | 0.00                                     |
|        | May 21–28, 2010      | 0.01                                    | ND                                             | 0.01                                          | 0.05                                         | 0.10                                         | 0.10                                         | 0.20                                         | 0.29                                          | 0.55                                     |
| Summer | June 22–29, 2009     | ND                                      | 0.01                                           | 0.02                                          | 0.06                                         | 0.11                                         | 0.19                                         | 0.09                                         | 0.05                                          | 0.29                                     |
|        | July 8–16, 2010      | ND                                      | ND                                             | ND                                            | ND                                           | 0.02                                         | 0.01                                         | 0.01                                         | 0.01                                          | 0.03                                     |
|        | August 6–13, 2010    | 0.05                                    | ND                                             | ND                                            | 0.03                                         | 0.03                                         | 0.01                                         | 0.01                                         | 0.01                                          | 0.01                                     |
| Autumn | October 6–13, 2009   | ND                                      | 0.00                                           | 0.02                                          | 0.04                                         | 0.09                                         | 0.05                                         | 0.03                                         | 0.03                                          | 0.03                                     |
|        | October 13–21, 2009  | ND                                      | ND                                             | 0.03                                          | 0.06                                         | 0.09                                         | 0.01                                         | 0.03                                         | 0.05                                          | 0.08                                     |
|        | October 21–28, 2009  | ND                                      | ND                                             | 0.01                                          | 0.03                                         | 0.04                                         | 0.02                                         | 0.01                                         | 0.04                                          | 0.03                                     |

(c) *n*-heptacosan-10-diol (SFA1)

| Season | Sampling Period      | Concentration (ng m <sup>-3</sup> )     |                                                |                                               |                                              |                                              |                                              |                                              |                                               |                                          |
|--------|----------------------|-----------------------------------------|------------------------------------------------|-----------------------------------------------|----------------------------------------------|----------------------------------------------|----------------------------------------------|----------------------------------------------|-----------------------------------------------|------------------------------------------|
|        |                      | Backup<br>(D <sub>p</sub> < 0.39<br>µm) | Stage 8<br>(D <sub>p</sub> = 0.39–<br>0.58 µm) | Stage 7<br>(D <sub>p</sub> = 0.58–<br>1.0 µm) | Stage 6<br>(D <sub>p</sub> = 1.0–<br>1.9 µm) | Stage 5<br>(D <sub>p</sub> = 1.9–<br>3.0 µm) | Stage 4<br>(D <sub>p</sub> = 3.0–<br>4.3 µm) | Stage 3<br>(D <sub>p</sub> = 4.3–<br>6.4 µm) | Stage 2<br>(D <sub>p</sub> = 6.4–<br>10.0 µm) | Stage 1<br>(D <sub>p</sub> > 10.0<br>µm) |
| Spring | April 26–May 7, 2010 | 0.02                                    | 0.01                                           | ND                                            | 0.02                                         | 0.02                                         | 0.02                                         | 0.01                                         | 0.06                                          | 0.05                                     |
|        | May 7–14, 2010       | ND                                      | ND                                             | ND                                            | ND                                           | 0.00                                         | 0.01                                         | 0.01                                         | 0.01                                          | 0.03                                     |
|        | May 21–28, 2010      | 0.01                                    | ND                                             | 0.01                                          | 0.02                                         | 0.04                                         | 0.05                                         | 0.08                                         | 0.11                                          | 0.19                                     |
| Summer | June 22–29, 2009     | 0.03                                    | 0.01                                           | ND                                            | ND                                           | 0.02                                         | 0.01                                         | ND                                           | ND                                            | 0.00                                     |
|        | July 8–16, 2010      | ND                                      | ND                                             | ND                                            | 0.01                                         | 0.02                                         | ND                                           | 0.01                                         | 0.00                                          | 0.02                                     |
|        | August 6–13, 2010    | ND                                      | ND                                             | ND                                            | 0.03                                         | 0.06                                         | 0.08                                         | 0.06                                         | 0.02                                          | 0.09                                     |
| Autumn | October 6–13, 2009   | ND                                      | ND                                             | ND                                            | 0.05                                         | 0.09                                         | 0.06                                         | 0.03                                         | 0.01                                          | 0.01                                     |
|        | October 13–21, 2009  | ND                                      | ND                                             | ND                                            | 0.04                                         | 0.17                                         | 0.14                                         | 0.05                                         | 0.03                                          | 0.03                                     |
|        | October 21–28, 2009  | ND                                      | ND                                             | ND                                            | 0.02                                         | 0.09                                         | 0.07                                         | 0.04                                         | 0.01                                          | 0.01                                     |

(d) *n*-nonacosan-10,13-diol (SFA4))

| Season | Sampling Period      | Concentration (ng m <sup>-3</sup> )     |                                                |                                               |                                              |                                              |                                              |                                              |                                               |                                          |
|--------|----------------------|-----------------------------------------|------------------------------------------------|-----------------------------------------------|----------------------------------------------|----------------------------------------------|----------------------------------------------|----------------------------------------------|-----------------------------------------------|------------------------------------------|
|        |                      | Backup<br>(D <sub>p</sub> < 0.39<br>µm) | Stage 8<br>(D <sub>p</sub> = 0.39–<br>0.58 µm) | Stage 7<br>(D <sub>p</sub> = 0.58–<br>1.0 µm) | Stage 6<br>(D <sub>p</sub> = 1.0–<br>1.9 µm) | Stage 5<br>(D <sub>p</sub> = 1.9–<br>3.0 µm) | Stage 4<br>(D <sub>p</sub> = 3.0–<br>4.3 µm) | Stage 3<br>(D <sub>p</sub> = 4.3–<br>6.4 µm) | Stage 2<br>(D <sub>p</sub> = 6.4–<br>10.0 µm) | Stage 1<br>(D <sub>p</sub> > 10.0<br>µm) |
| Spring | April 26–May 7, 2010 | ND                                      | ND                                             | ND                                            | 0.02                                         | 0.02                                         | 0.01                                         | 0.01                                         | 0.02                                          | 0.04                                     |
|        | May 7–14, 2010       | ND                                      | ND                                             | ND                                            | ND                                           | ND                                           | ND                                           | ND                                           | ND                                            | ND                                       |
|        | May 21–28, 2010      | ND                                      | ND                                             | ND                                            | 0.03                                         | 0.03                                         | 0.03                                         | 0.08                                         | 0.09                                          | 0.18                                     |
| Summer | June 22–29, 2009     | ND                                      | ND                                             | ND                                            | 0.01                                         | 0.03                                         | 0.04                                         | 0.02                                         | 0.01                                          | 0.07                                     |
|        | July 8–16, 2010      | ND                                      | ND                                             | ND                                            | ND                                           | ND                                           | ND                                           | ND                                           | ND                                            | 0.01                                     |
|        | August 6–13, 2010    | 0.02                                    | ND                                             | ND                                            | ND                                           | ND                                           | ND                                           | ND                                           | ND                                            | ND                                       |
| Autumn | October 6–13, 2009   | ND                                      | ND                                             | ND                                            | 0.01                                         | 0.02                                         | 0.01                                         | 0.01                                         | 0.01                                          | 0.01                                     |
|        | October 13–21, 2009  | ND                                      | ND                                             | ND                                            | ND                                           | 0.02                                         | 0.02                                         | 0.01                                         | 0.02                                          | 0.02                                     |
|        | October 21–28, 2009  | ND                                      | ND                                             | ND                                            | 0.01                                         | 0.01                                         | 0.00                                         | 0.01                                         | 0.00                                          | 0.01                                     |
